# Supplementary material for: Apremilast Pharmacogenomics in Russian Patients with Moderate-to-Severe and Severe Psoriasis
Source: PubMed Central journal article supplement (PMC7823747; doi:10.3390/jpm11010020), 2020-12-29
Supplement: jpm-11-00020-s001.pdf [file jpm-11-00020-s001.pdf]

Supplementary Table 1. List of top SNP resulted from the association test of genome-wide pharmacogenomic study on apremilast between patients groups with distant therapy outcome (allele designation according Genome Reference Consortium Human Build 37 (GRCh37)).

| Chromosome number | SNP reference sequence | Chromosome position | Most frequent allele variant | Minimal frequency allele variant | Allele frequency in efficient target therapy response group | Allele frequency in the insufficient target therapy response group | Coincidence probability |
|-------------------|------------------------|---------------------|------------------------------|----------------------------------|-------------------------------------------------------------|--------------------------------------------------------------------|-------------------------|
| 5                 | rs371208912            | 28107813            | T                            | TATA                             | 0                                                           | 0,55                                                               | 1,83E-06                |
| 2                 | rs12468345             | 59518670            | G                            | A                                | 0,75                                                        | 0,2                                                                | 6,38E-06                |
| 2                 | rs1344461              | 59544419            | T                            | C                                | 0,75                                                        | 0,2                                                                | 6,38E-06                |
| 2                 | rs10166053             | 59545031            | G                            | A                                | 0,75                                                        | 0,2                                                                | 6,38E-06                |
| 2                 | rs12478341             | 59546517            | C                            | T                                | 0,75                                                        | 0,2                                                                | 6,38E-06                |
| 2                 | rs11679165             | 59547991            | G                            | A                                | 0,75                                                        | 0,2                                                                | 6,38E-06                |
| 2                 | rs10182747             | 59519869            | C                            | A                                | 0,71                                                        | 0,18                                                               | 7,71E-06                |
| 2                 | rs11691103             | 59544147            | C                            | T                                | 0,71                                                        | 0,18                                                               | 7,71E-06                |
| 2                 | rs10192391             | 59545266            | G                            | C                                | 0,71                                                        | 0,18                                                               | 7,71E-06                |
| 2                 | rs13028418             | 59546095            | C                            | T                                | 0,71                                                        | 0,18                                                               | 7,71E-06                |
| 2                 | rs116436464            | 59555437            | G                            | A                                | 0,71                                                        | 0,18                                                               | 7,71E-06                |
| 23                | rs35084576             | 2998500             | C                            | T                                | 0,68                                                        | 0,04                                                               | 7,99E-06                |
| 4                 | rs13124213             | 179875031           | A                            | G                                | 0                                                           | 0,5                                                                | 8,45E-06                |
| 4                 | rs34105287             | 179875449           | G                            | GA                               | 0                                                           | 0,5                                                                | 8,45E-06                |
| 4                 | rs4561967              | 179877696           | A                            | G                                | 0                                                           | 0,5                                                                | 8,45E-06                |
| 4                 | rs3943521              | 179877850           | T                            | G                                | 0                                                           | 0,5                                                                | 8,45E-06                |
| 4                 | rs1451428              | 179878094           | C                            | A                                | 0                                                           | 0,5                                                                | 8,45E-06                |
| 4                 | rs1903409              | 179878200           | A                            | G                                | 0                                                           | 0,5                                                                | 8,45E-06                |
| 4                 | rs2060771              | 179878367           | C                            | T                                | 0                                                           | 0,5                                                                | 8,45E-06                |
| 4                 | rs1839757              | 179878919           | T                            | C                                | 0                                                           | 0,5                                                                | 8,45E-06                |
| 4                 | rs6828097              | 179879147           | C                            | T                                | 0                                                           | 0,5                                                                | 8,45E-06                |
| 4                 | rs6851615              | 179879242           | C                            | G                                | 0                                                           | 0,5                                                                | 8,45E-06                |
| 4                 | rs6851276              | 179879278           | T                            | C                                | 0                                                           | 0,5                                                                | 8,45E-06                |
| 4                 | rs6851252              | 179879279           | G                            | A                                | 0                                                           | 0,5                                                                | 8,45E-06                |
| 4                 | rs10021175             | 179879485           | A                            | C                                | 0                                                           | 0,5                                                                | 8,45E-06                |

Supplementary Table 1. List of top SNP resulted from the association test of genome-wide pharmacogenomic study on apremilast between patients groups with distant therapy outcome (allele designation according Genome Reference Consortium Human Build 37 (GRCh37)).

|   |             |           |   |       |   |     |          |
|---|-------------|-----------|---|-------|---|-----|----------|
| 4 | rs67655789  | 179879792 | T | TATG  | 0 | 0,5 | 8,45E-06 |
| 4 | rs10021825  | 179880039 | A | G     | 0 | 0,5 | 8,45E-06 |
| 4 | rs13122542  | 179880437 | T | C     | 0 | 0,5 | 8,45E-06 |
| 4 | rs6814835   | 179880495 | T | A     | 0 | 0,5 | 8,45E-06 |
| 4 | rs6841410   | 179880885 | G | T     | 0 | 0,5 | 8,45E-06 |
| 4 | rs28414971  | 179880948 | T | C     | 0 | 0,5 | 8,45E-06 |
| 4 | rs10024813  | 179881046 | T | C     | 0 | 0,5 | 8,45E-06 |
| 4 | rs1075183   | 179881743 | G | T     | 0 | 0,5 | 8,45E-06 |
| 4 | rs1075182   | 179881787 | C | T     | 0 | 0,5 | 8,45E-06 |
| 4 | rs28699520  | 179882372 | A | G     | 0 | 0,5 | 8,45E-06 |
| 4 | rs6830112   | 179883344 | G | A     | 0 | 0,5 | 8,45E-06 |
| 4 | rs6830337   | 179883428 | G | A     | 0 | 0,5 | 8,45E-06 |
| 4 | rs6844672   | 179885472 | C | G     | 0 | 0,5 | 8,45E-06 |
| 4 | rs141155679 | 179885969 | T | TTTTC | 0 | 0,5 | 8,45E-06 |
| 4 | rs6850919   | 179886305 | T | C     | 0 | 0,5 | 8,45E-06 |
| 4 | rs12645034  | 179886711 | C | T     | 0 | 0,5 | 8,45E-06 |
| 4 | rs11131890  | 179887239 | A | C     | 0 | 0,5 | 8,45E-06 |
| 4 | rs6552320   | 179888435 | G | A     | 0 | 0,5 | 8,45E-06 |
| 4 | rs6552321   | 179888548 | C | G     | 0 | 0,5 | 8,45E-06 |
| 4 | rs28689131  | 179890992 | T | C     | 0 | 0,5 | 8,45E-06 |
| 4 | rs12108561  | 179891076 | G | C     | 0 | 0,5 | 8,45E-06 |
| 4 | rs62333826  | 179891529 | G | A     | 0 | 0,5 | 8,45E-06 |
| 4 | rs11131891  | 179892637 | A | G     | 0 | 0,5 | 8,45E-06 |
| 4 | rs17792161  | 179893411 | G | C     | 0 | 0,5 | 8,45E-06 |
| 4 | rs9992240   | 179895198 | T | G     | 0 | 0,5 | 8,45E-06 |
| 4 | rs4272057   | 179895526 | G | A     | 0 | 0,5 | 8,45E-06 |
| 4 | rs4423919   | 179895566 | G | T     | 0 | 0,5 | 8,45E-06 |
| 4 | rs13139913  | 179896260 | C | T     | 0 | 0,5 | 8,45E-06 |
| 4 | rs9998128   | 179896707 | A | G     | 0 | 0,5 | 8,45E-06 |
| 4 | rs28415348  | 179897406 | C | T     | 0 | 0,5 | 8,45E-06 |

Supplementary Table 1. List of top SNP resulted from the association test of genome-wide pharmacogenomic study on apremilast between patients groups with distant therapy outcome (allele designation according Genome Reference Consortium Human Build 37 (GRCh37)).

|   |             |           |           |     |      |      |          |
|---|-------------|-----------|-----------|-----|------|------|----------|
| 4 | rs2060772   | 179898113 | C         | G   | 0    | 0,5  | 8,45E-06 |
| 4 | rs13102434  | 179898167 | C         | T   | 0    | 0,5  | 8,45E-06 |
| 4 | rs71601118  | 179901197 | TTGTGTGTG | T   | 0    | 0,5  | 8,45E-06 |
| 4 | rs34022518  | 179902400 | T         | C   | 0    | 0,5  | 8,45E-06 |
| 4 | rs6812232   | 179903243 | G         | A   | 0    | 0,5  | 8,45E-06 |
| 4 | rs150336386 | 179908853 | C         | T   | 0    | 0,5  | 8,45E-06 |
| 4 | rs113143277 | 179909528 | A         | G   | 0    | 0,5  | 8,45E-06 |
| 4 | rs141850912 | 179909745 | A         | G   | 0    | 0,5  | 8,45E-06 |
| 4 | rs12645585  | 179912441 | A         | C   | 0    | 0,5  | 8,45E-06 |
| 4 | rs35653024  | 179918367 | A         | G   | 0    | 0,5  | 8,45E-06 |
| 4 | rs34462324  | 179918390 | A         | C   | 0    | 0,5  | 8,45E-06 |
| 5 | rs2329722   | 28098757  | G         | A   | 0    | 0,5  | 8,45E-06 |
| 5 | rs7712909   | 28109564  | A         | G   | 0    | 0,5  | 8,45E-06 |
| 5 | rs35733073  | 28110318  | C         | CAT | 0    | 0,5  | 8,45E-06 |
| 5 | rs10067148  | 28112135  | T         | C   | 0    | 0,5  | 8,45E-06 |
| 5 | rs6891780   | 28114207  | T         | C   | 0    | 0,5  | 8,45E-06 |
| 2 | rs35032411  | 59545167  | CA        | C   | 0,68 | 0,15 | 8,63E-06 |
